# Supplementary material for: C/EBPβ/AEP is age-dependently activated in Parkinson’s disease and mediates α-synuclein in the gut and brain
Source: Springer Nature journal article supplement (doi:10.1038/s41531-022-00430-8), 2023-01-06
Supplement: MOESM1 [file 41531_2022_430_MOESM1_ESM.pdf]

# Supplementary Figure 1

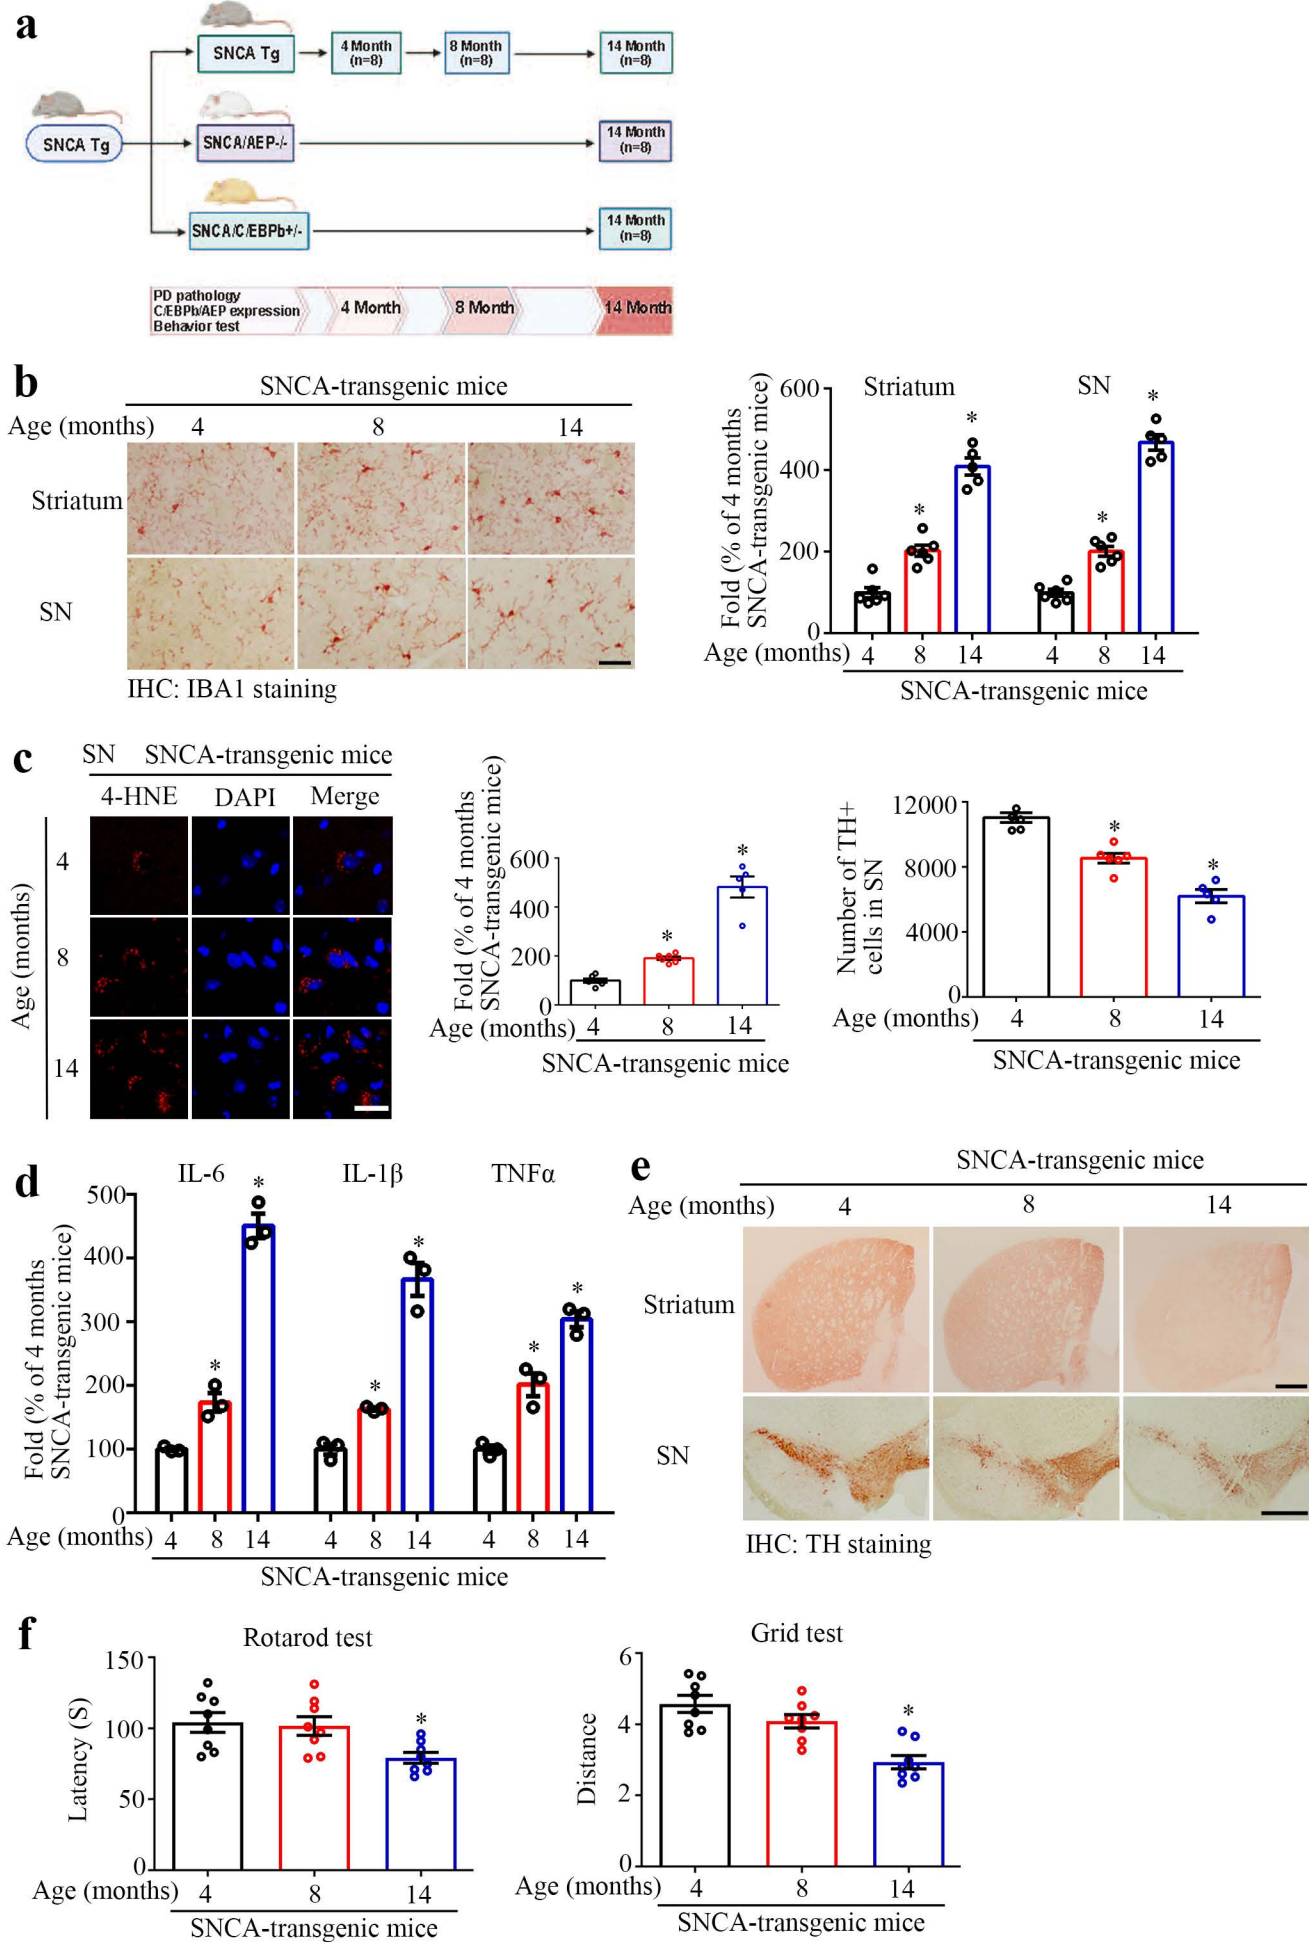

**Supplementary figure 1. Microglia activation and oxidative stress are age-dependently elevated in  $\alpha$ -SNCA mice.**

(a) The graphical scheme of the experimental groups. (b) Immunostaining and the quantification of Iba1 in the striatum and SN. (n = 5-6 per group,  $*P < 0.05$  vs 4 months old  $\alpha$ -SNCA transgenic mouse, one-way ANOVA). Scale bar, 50  $\mu$ m. (c) 4-HNE staining and the quantification in the SN. (n = 5-6 per group,  $*P < 0.05$  vs 4 months old  $\alpha$ -SNCA transgenic mouse, one-way ANOVA). Scale bar, 20  $\mu$ m. (d) The expression levels of inflammatory cytokines in  $\alpha$ -SNCA transgenic mice during aging. (n = 3 per group,  $*P < 0.05$  vs 4 months old  $\alpha$ -SNCA transgenic mouse, one-way ANOVA). (e) Immunostaining of TH in the striatum and SN, and the quantification of TH in SN. Scale bar, 50  $\mu$ m. (n = 5-6 per group,  $*P < 0.05$  vs 4 months old  $\alpha$ -SNCA transgenic mouse, one-way ANOVA). (f) Rotarod test and Grid test. (mean  $\pm$  s.e.m.; n = 8 mice per group;  $*P < 0.05$  vs 4 months old  $\alpha$ -SNCA transgenic mouse, one-way ANOVA).

## Supplementary Figure 2

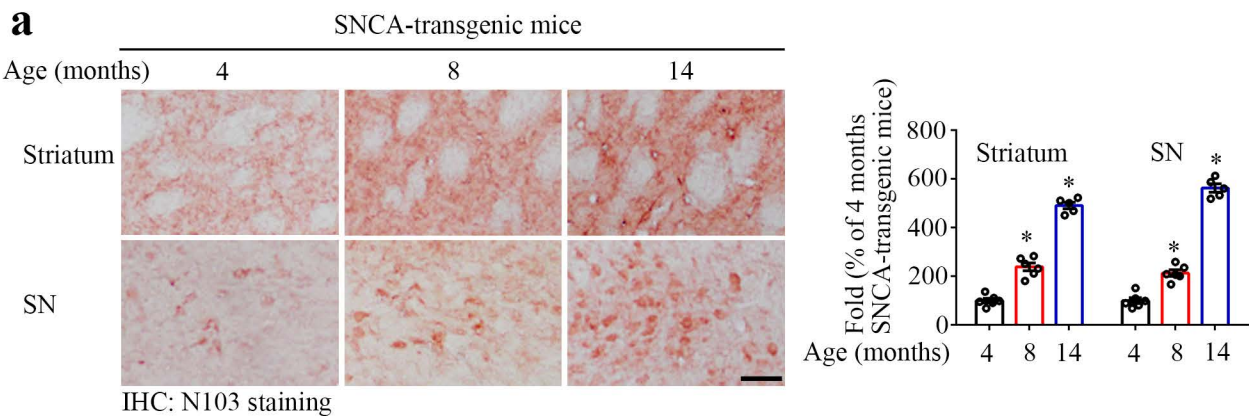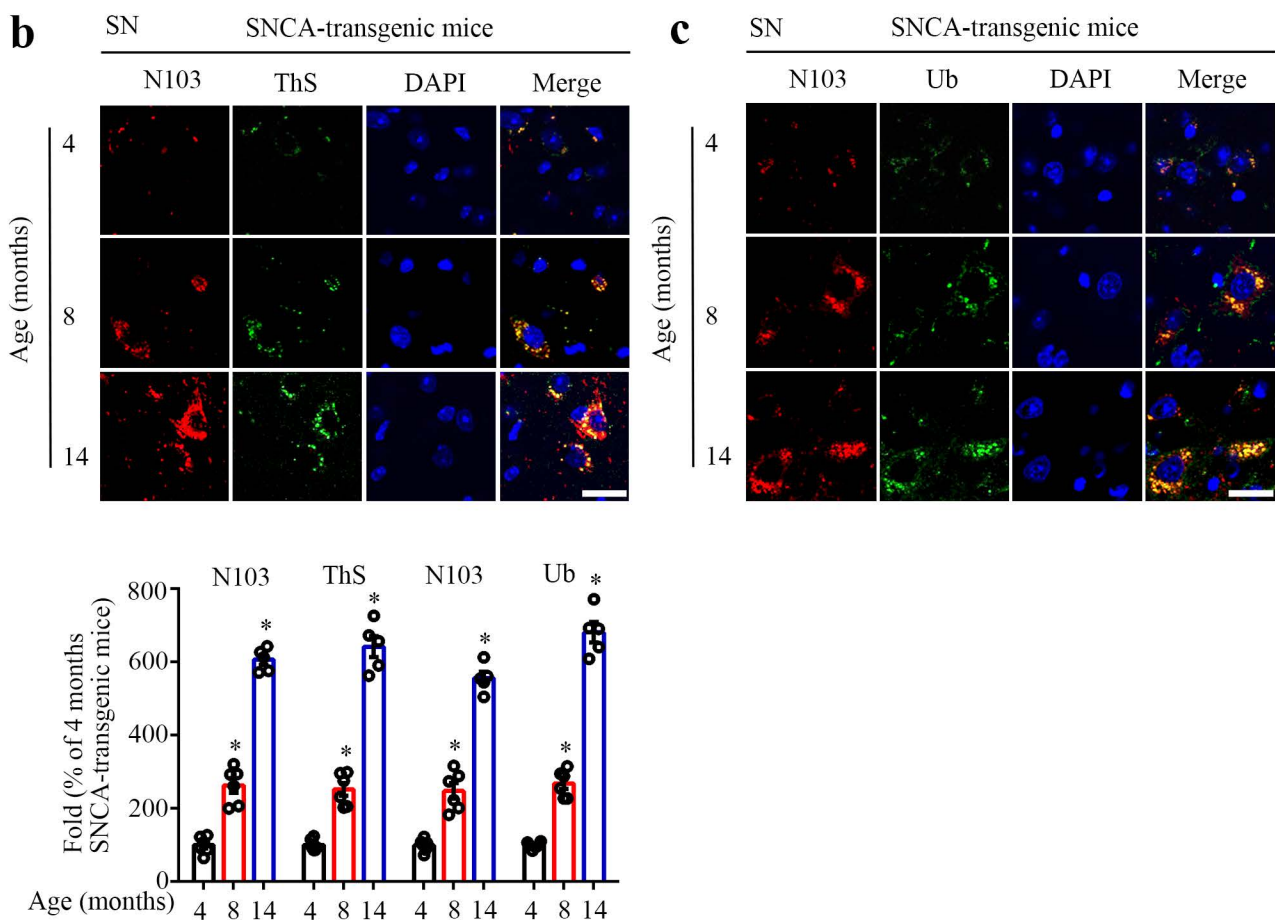

**Supplementary figure 2.  $\alpha$ -Syn is proteolytically cleaved at N103 and aggregated in an age-dependent manner in human  $\alpha$ -SNCA mice.** (a) Immunohistochemistry and the quantification of the  $\alpha$ -Syn N103 in the striatum and SN of the  $\alpha$ -SNCA transgenic mouse during aging. (n = 5-6 per group,  $*P < 0.05$  vs 4 months old  $\alpha$ -SNCA transgenic mouse, one-way ANOVA). Scale bar, 50  $\mu$ m. Immunofluorescent co-staining and the quantification of  $\alpha$ -Syn N103 and ThS (b),  $\alpha$ -Syn N103 and Ub (c) in SN. (n = 5-6 per group,  $*P < 0.05$  vs 4 months old  $\alpha$ -SNCA transgenic mouse, one-way ANOVA). Scale bar, 20  $\mu$ m.

# Supplementary Figure 3

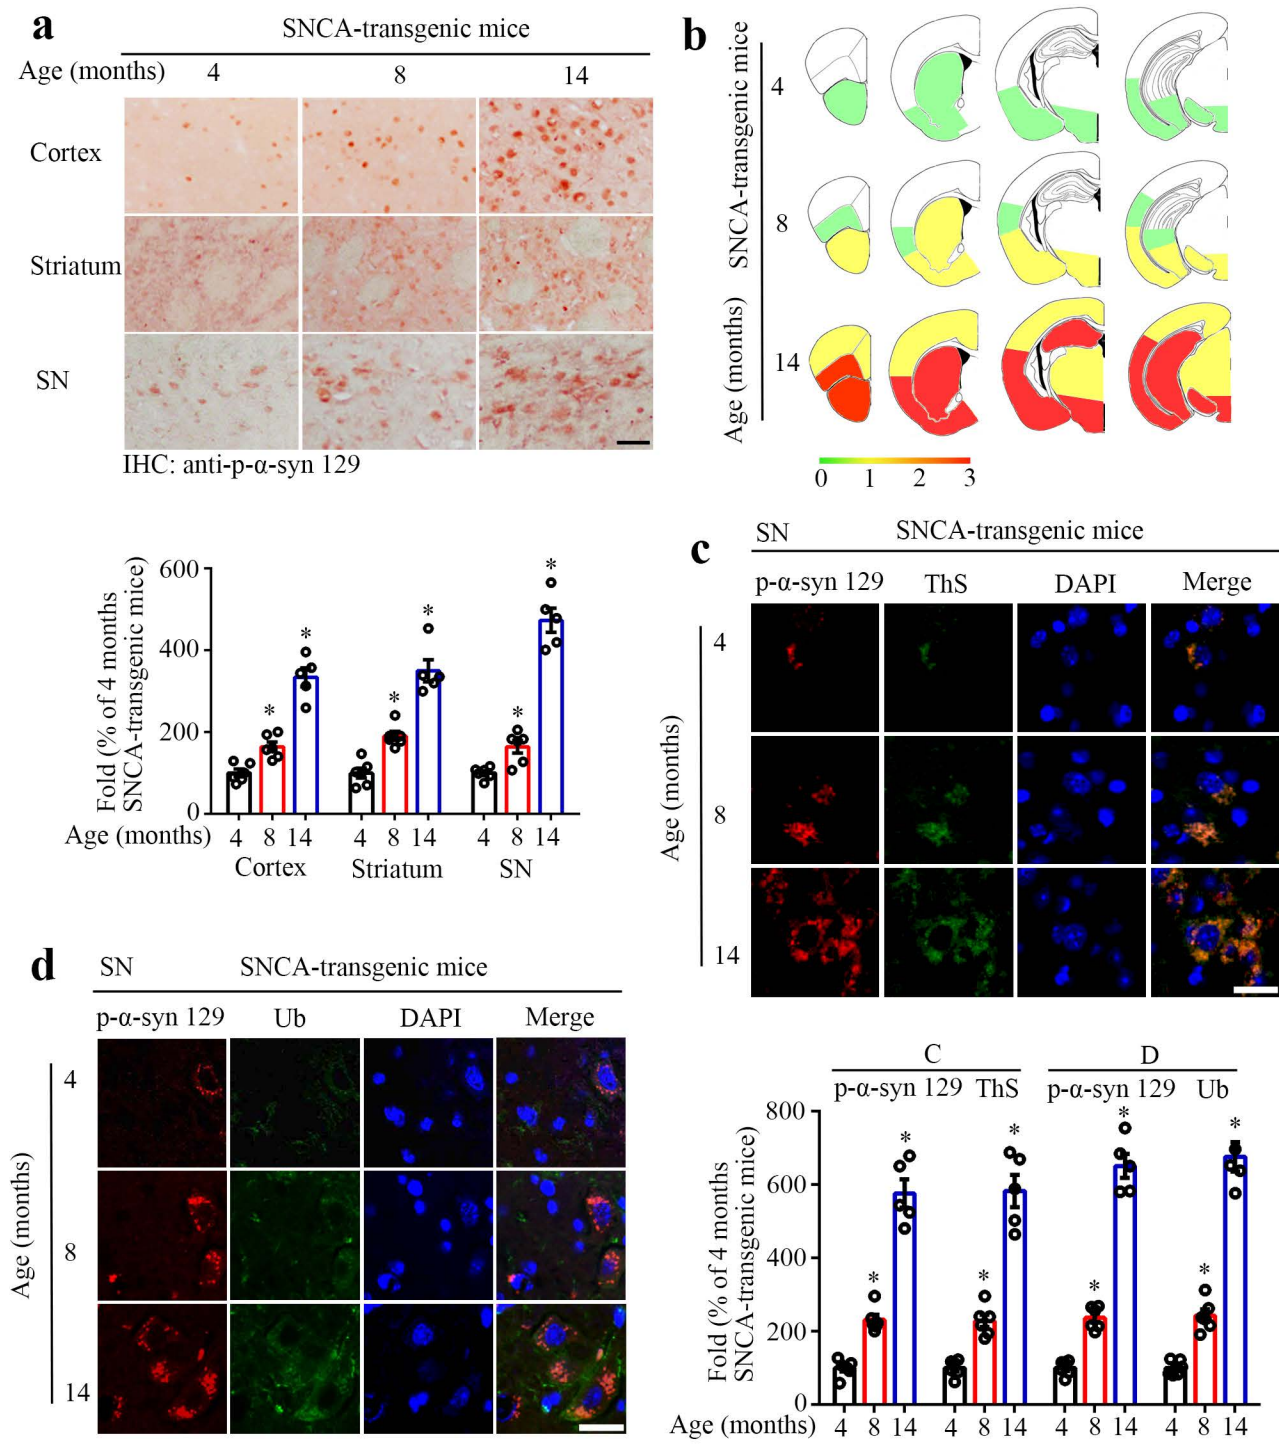

**Supplementary figure 3.  $\alpha$ -Syn S129 phosphorylation and Lewy body formation are escalated in an age-dependent way in  $\alpha$ -SNCA mice.** (a) Immunohistochemistry and the quantification of p- $\alpha$ -Syn 129 in the cortex, striatum, and SN. (n = 5-6 per group, \* $P < 0.05$  vs 4 months old  $\alpha$ -SNCA transgenic mouse, one-way ANOVA). Scale bar, 50  $\mu$ m. (b) Heat map colors represent the extent of p- $\alpha$ -Syn 129 pathologies (white (0), no pathology; red (3), the maximal pathology). Immunofluorescent co-staining and the quantification of p- $\alpha$ -Syn 129 and ThS (c), p- $\alpha$ -Syn 129, and Ub (d) in SN. (n = 5-6 per group, \* $P < 0.05$  vs 4 months old  $\alpha$ -SNCA transgenic mouse, one-way ANOVA). Scale bar, 20  $\mu$ m.



# Supplementary Figure 4

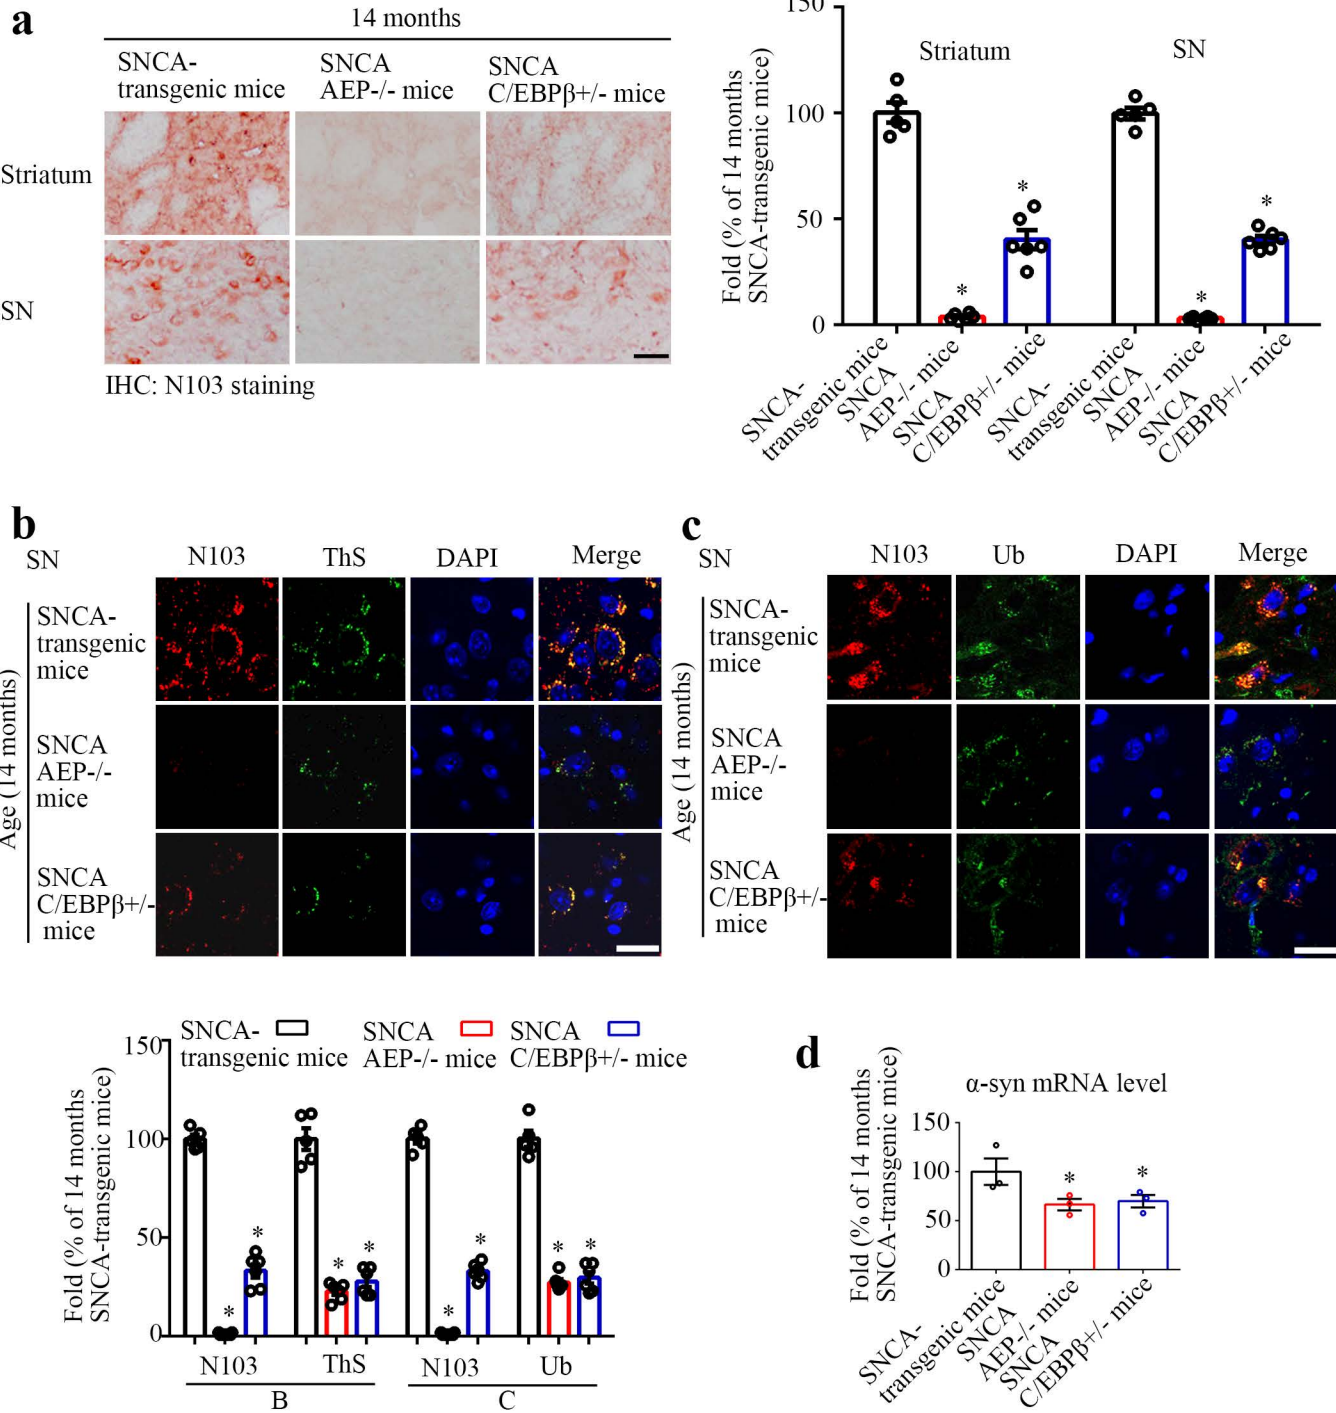

**Supplementary figure 4.  $\alpha$ -Syn N103 fragmentation and aggregation are attenuated when**

**C/EBP $\beta$  or AEP is depleted in human  $\alpha$ -SNCA mice.** (a) Immunohistochemistry and the quantification of the  $\alpha$ -Syn N103 in the striatum and SN. (n = 5-6 per group,  $*P < 0.05$  vs 14 months old  $\alpha$ -SNCA transgenic mouse, one-way ANOVA). Scale bar, 50  $\mu$ m.

Immunofluorescent co-staining and the quantification of  $\alpha$ -Syn N103 and ThS (b),  $\alpha$ -Syn N103 and Ub (c) in SN. (n = 5-6 per group,  $*P < 0.05$  vs 14 months old  $\alpha$ -SNCA transgenic mouse, one-way ANOVA). Scale bar, 20  $\mu$ m.



# Supplementary Figure 5

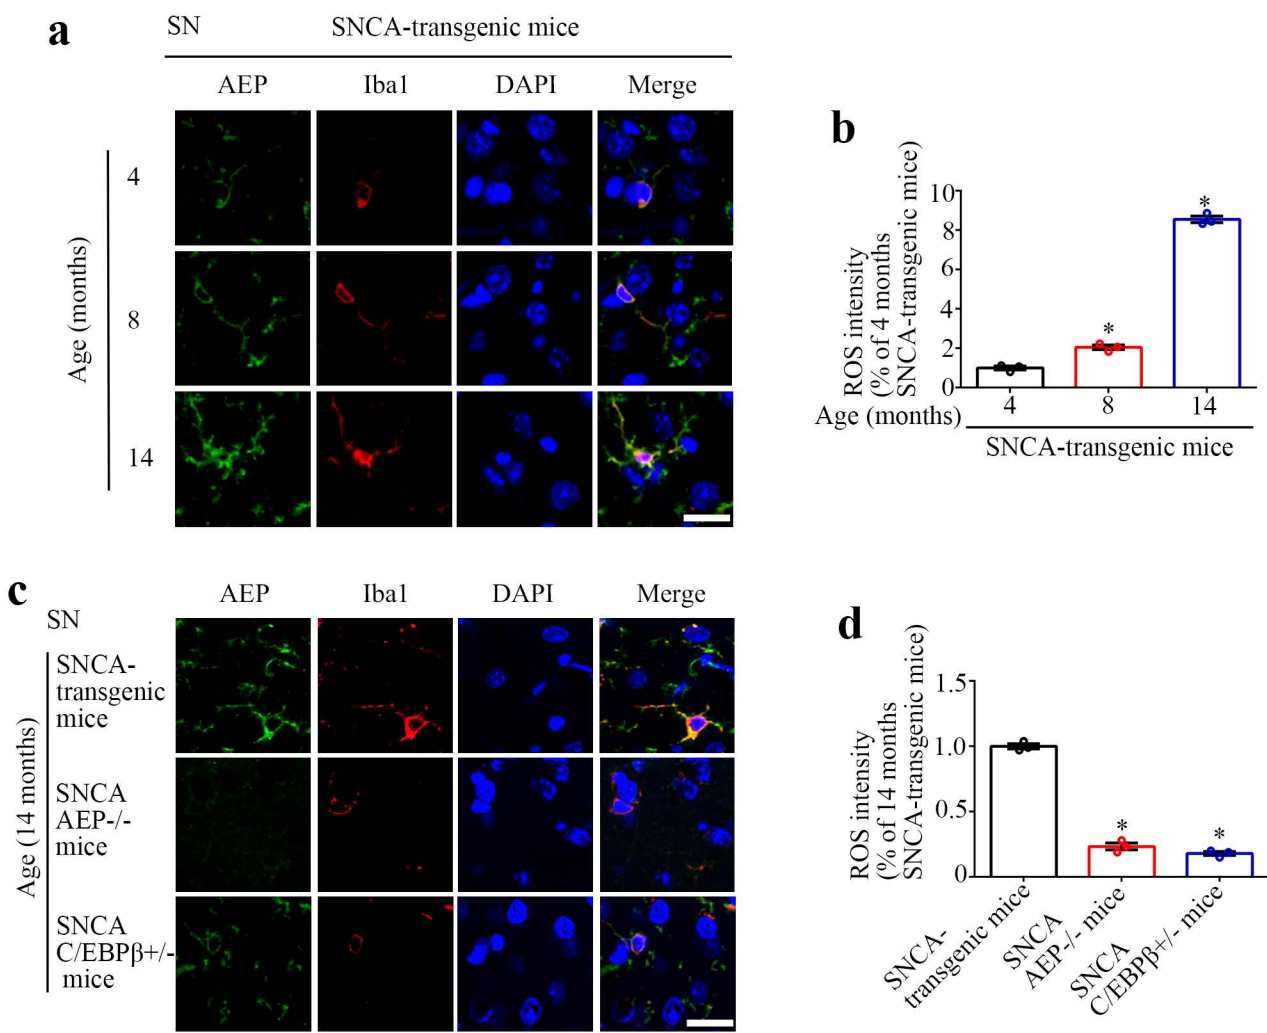

**Supplementary figure 5. C/EBP $\beta$ /AEP axis mediates microglia activation and ROS in human  $\alpha$ -SNCA mice.** (a) Immunofluorescent co-staining of AEP and Iba1 and ROS intensity (b) in SN of the  $\alpha$ -SNCA transgenic mouse during aging. Scale bar, 20  $\mu$ m. (n = 3 per group, \* $P$  < 0.05 vs 4 months old  $\alpha$ -SNCA transgenic mouse, one-way ANOVA). (c) Reduction of C/EBP $\beta$  and knockdown of delta-secretase decreases the expression of AEP, Iba1, and ROS intensity (d) in the  $\alpha$ -SNCA transgenic mouse. Scale bar, 20  $\mu$ m. (n = 3 per group, \* $P$  < 0.05 vs 14 months old  $\alpha$ -SNCA transgenic mouse, one-way ANOVA).

# Supplementary Figure 6

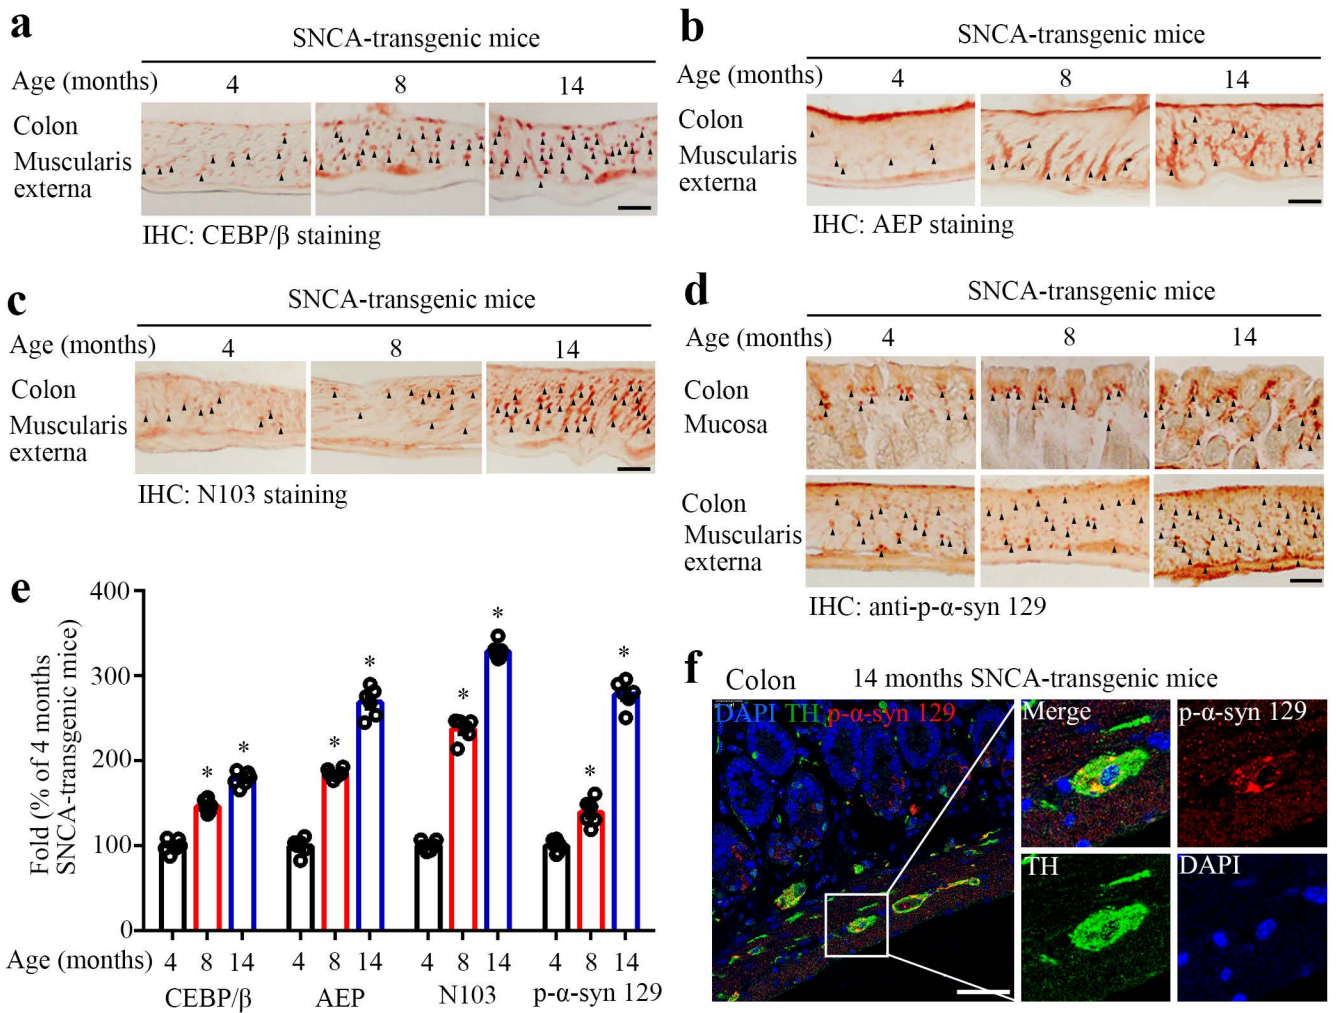

**Supplementary figure 6. C/EBP $\beta$ /AEP axis activation and Lewy body-like pathology in the gut of  $\alpha$ -SNCA mice.** Immunohistochemistry of the C/EBP $\beta$  (a), AEP (b),  $\alpha$ -Syn N103 (c), p- $\alpha$ -Syn 129 (d), and the quantification (e) in the colon of  $\alpha$ -SNCA transgenic mouse during aging. The co-staining of TH and p- $\alpha$ -Syn 129. Scale bar, 50  $\mu$ m. (the positive signals were indicated with a black triangle, n = 6 per group, \* $P$  < 0.05 vs 4 months old  $\alpha$ -SNCA transgenic mouse, one-way ANOVA).

# Supplementary Figure 7

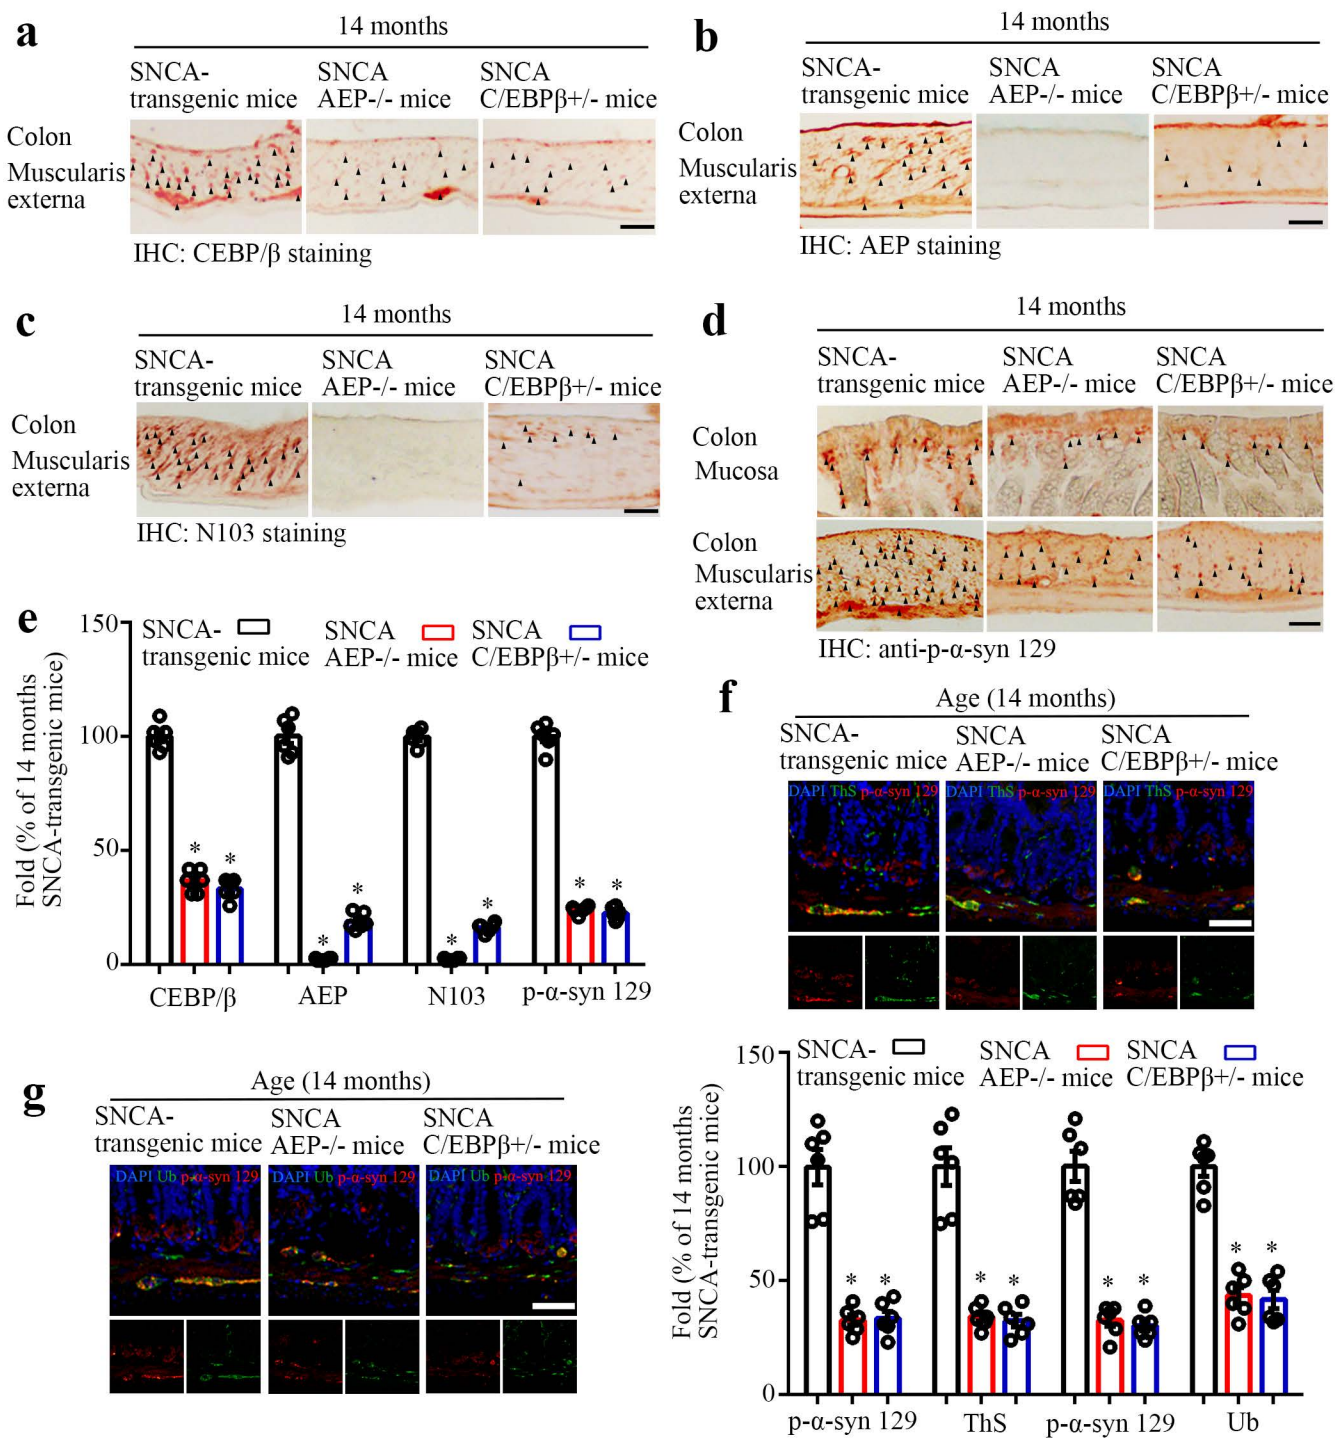

**Supplementary figure 7. Inactivation of C/EBP $\beta$ /AEP in  $\alpha$ -SNCA mice blunts Lewy body-like pathology in the gut.** Reduction of C/EBP $\beta$  and knockdown of delta-secretase decreases the expression of the C/EBP $\beta$  (a), AEP (b),  $\alpha$ -Syn N103 (c), p- $\alpha$ -Syn 129 (d), and the quantification (e) in the colon of  $\alpha$ -SNCA transgenic mouse. Scale bar, 50  $\mu$ m. (the positive signals were indicated with a black triangle, n = 6 per group, \* $P$  < 0.05 vs 14 months old  $\alpha$ -SNCA transgenic mouse, one-way ANOVA). Immunofluorescent co-staining and the quantification of p- $\alpha$ -Syn 129 and ThS (f), p- $\alpha$ -Syn 129, and Ub (g) in the colon. (n = 6 per group, \* $P$  < 0.05 vs 14 months old  $\alpha$ -SNCA transgenic mouse, one-way ANOVA). Scale bar, 50  $\mu$ m.

# Supplementary Figure 8

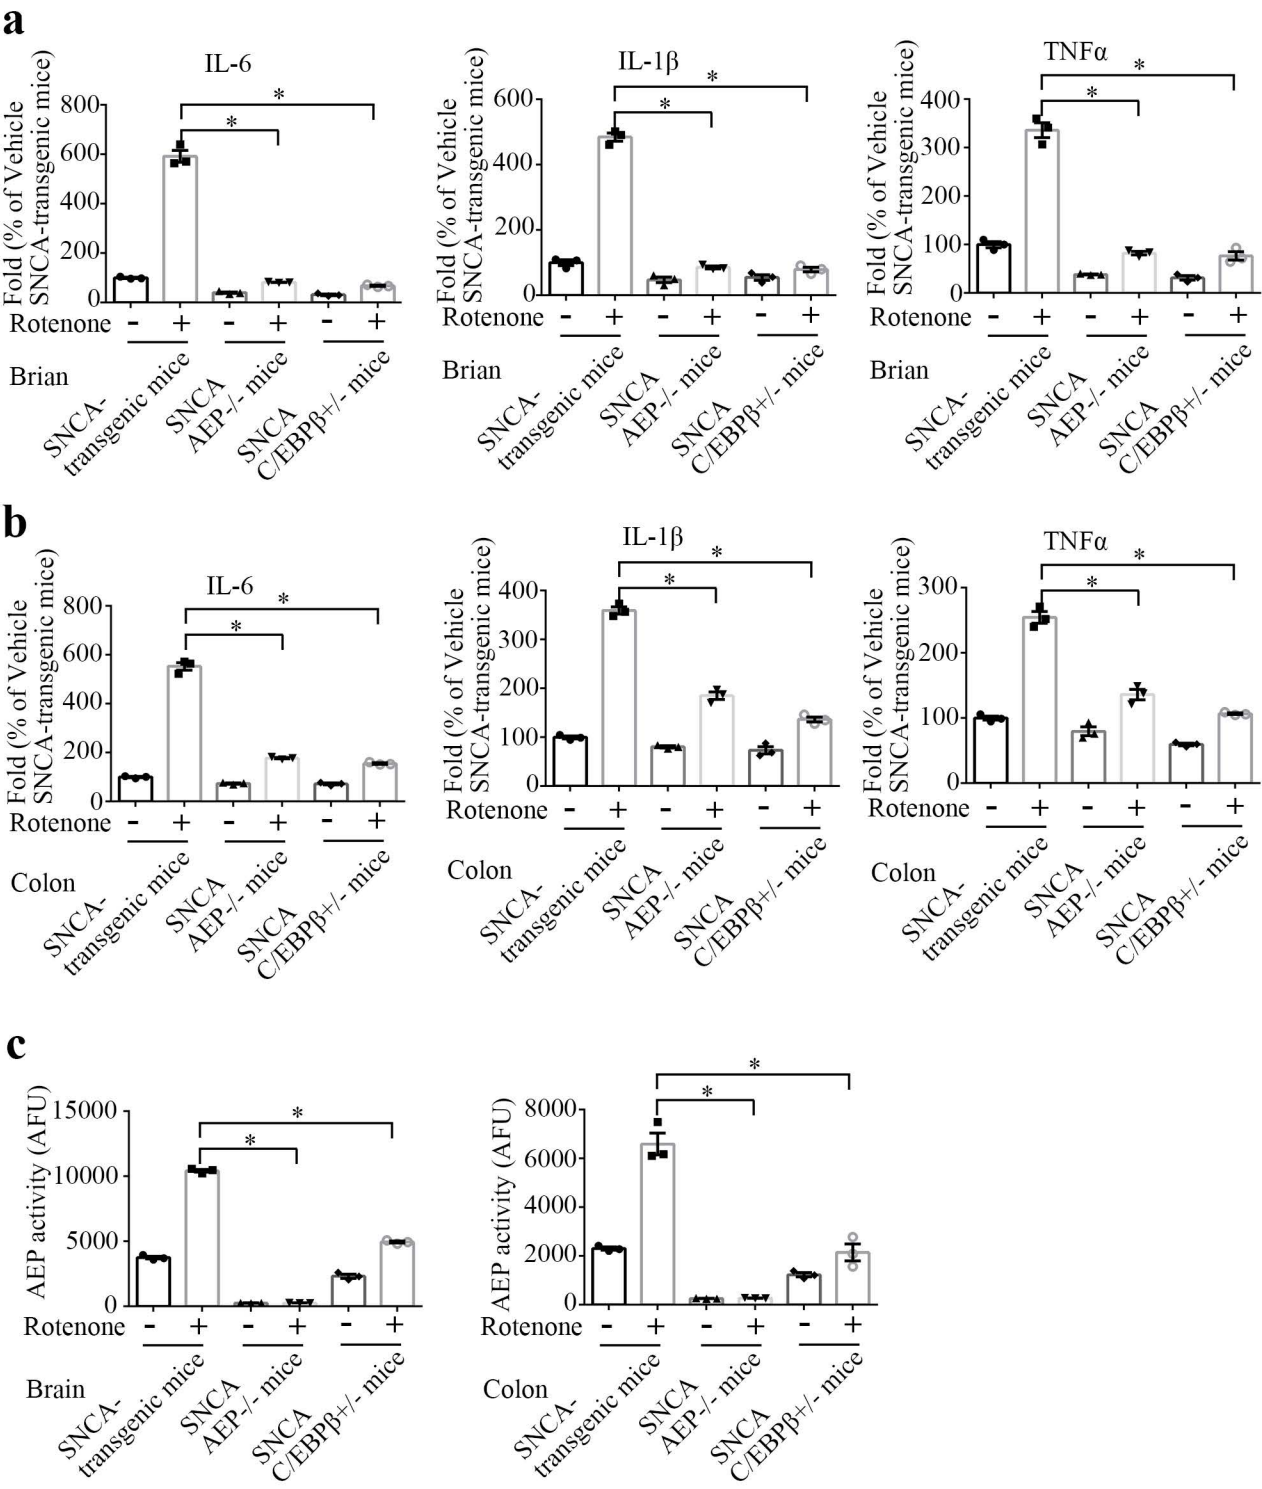



**Supplementary figure 8. C/EBP $\beta$ /AEP knockout mitigates inflammation in the gut and brain of  $\alpha$ -SNCA mice.** Reduction of C/EBP $\beta$  and knockdown of delta-secretase decreases the expression levels of inflammatory cytokines in the brain (a) and colon (b) of the  $\alpha$ -SNCA transgenic mouse after rotenone treatment. (n = 3 per group,  $*P < 0.05$  vs  $\alpha$ -SNCA transgenic mouse, one-way ANOVA). (c) AEP activity assay in the brain and colon samples (n = 3 per group,  $*P < 0.05$  vs  $\alpha$ -SNCA transgenic mouse, one-way ANOVA).

**Supplementary Table.** Human Samples Information

| Cases   | Age at Onset | Age at Death | Sex    |
|---------|--------------|--------------|--------|
| Control | X            | 68           | male   |
| Control | X            | 85           | male   |
| Control | X            | 61           | female |
| Control | X            | 70           | male   |
| PD      | 74           | 84           | female |
| PD      | 67           | 74           | male   |
| PD      | 52           | 58           | male   |
| PD      | 48           | 69           | male   |
